# Supplementary material for: Rheumatoid Arthritis and Risk of Depression in South Korea
Source: PubMed Central journal article supplement (PMC10915683; doi:10.1001/jamanetworkopen.2024.1139), 2024-03-05
Supplement: jamanetwopen-e241139-s002.pdf [file jamanetwopen-e241139-s002.pdf]

## Data Sharing Statement

Jeon. Rheumatoid Arthritis and Risk of Depression in South Korea. *JAMA Netw Open*.  
Published March 05, 2024. doi:10.1001/jamanetworkopen.2024.1139

### Data

**Data available:** No
